# Supplementary material
Source: PubMed Central journal article supplement (PMC2519770)
Supplement: supp_7_8_1352__1.pdf [file supp_7_8_1352__1.pdf]

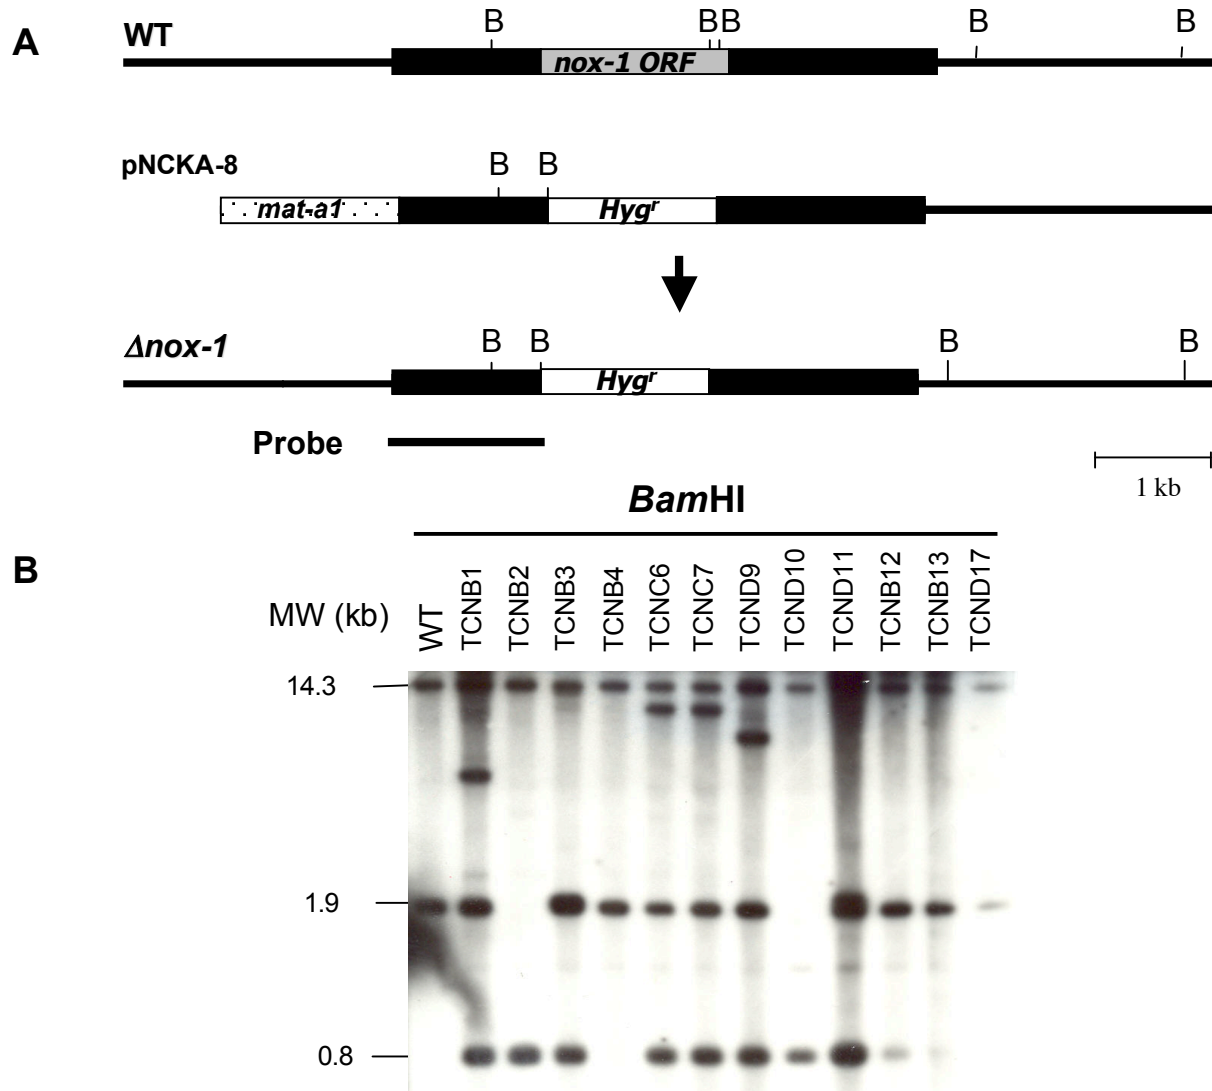

**Fig. S2. Deletion of the *nox-1* gene.** (A) The *nox-1* deletion plasmid pNCKA-8 containing the *mat-a1* gene, as counter selection marker, and the hygromycin resistance marker *Hyg<sup>r</sup>* was used to transform strain RPNCR3A. A double recombination event results in replacement of the wild type *nox-1* gene. B indicates *Bam*HI sites. (B) DNA from the WT and hygromycin resistance transformants was digested with *Bam*HI and used for Southern blot analysis with the indicated probe. The wild type *Bam*HI pattern corresponds to bands of 14.3 and 1.9 kb, while the *nox-1* deletion pattern corresponds to bands of 14.3 and 0.8 kb (strains TCNB2 and TCND10).

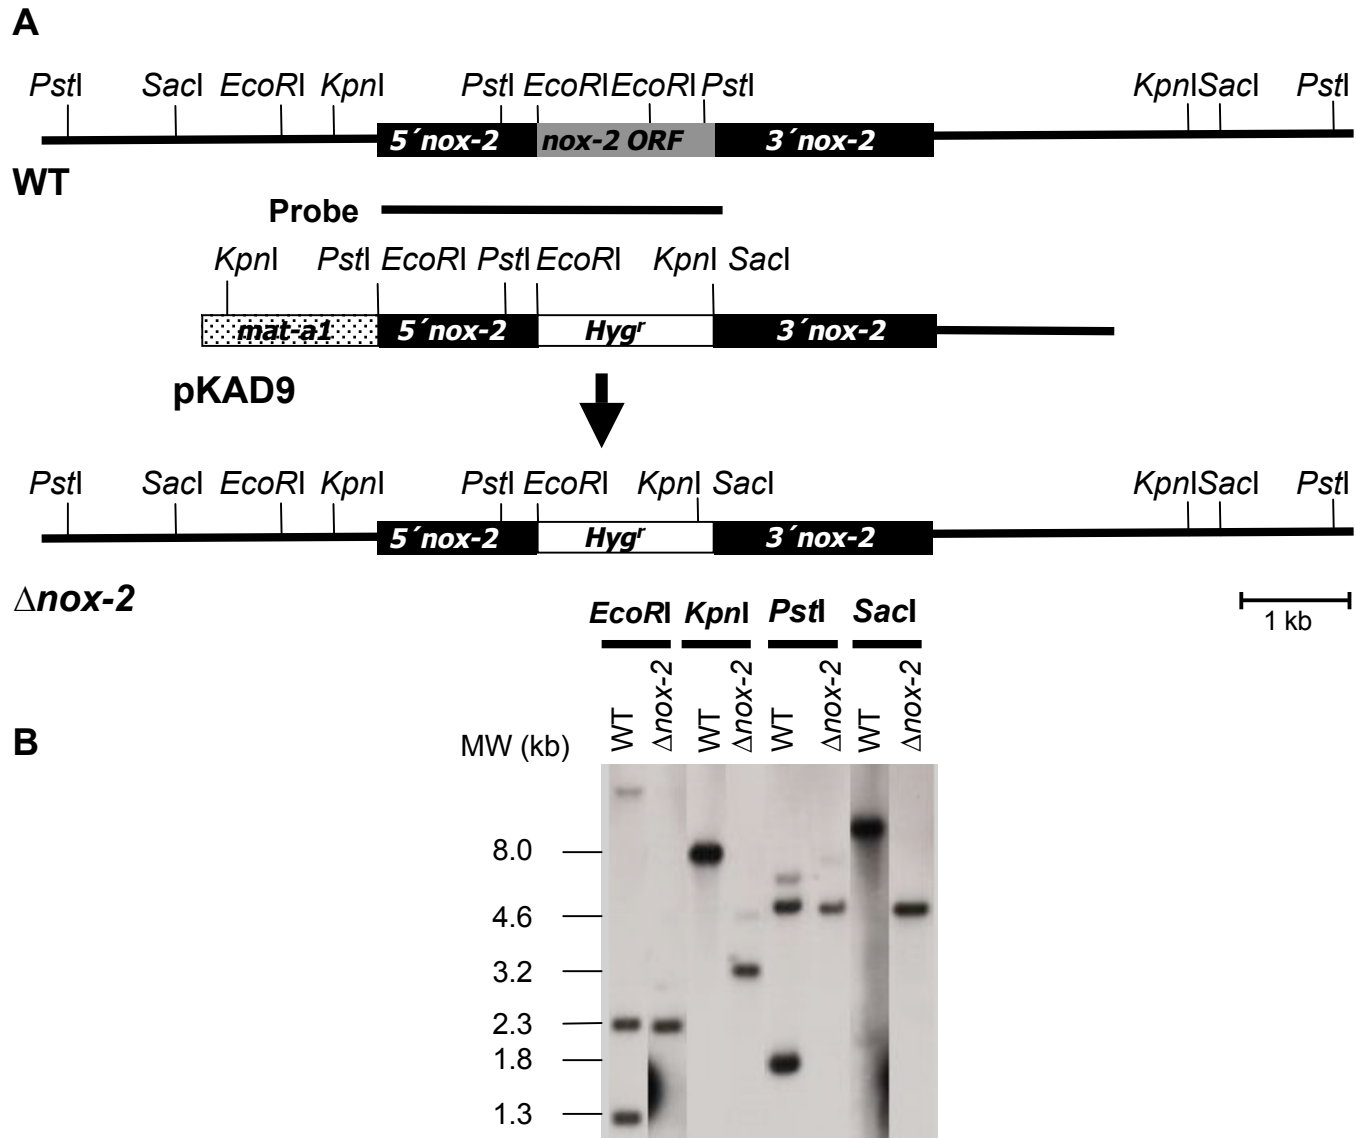

**Fig. S3. Deletion of the *nox-2* gene.** (A) In plasmid pKAD9 85% of *nox-2* ORF was replaced by the hygromycin resistance marker *Hyg<sup>r</sup>*. (B) To verify *nox-2* deletion, DNA from WT and hygromycin resistance transformants was digested with *PstI*, *SacI*, *EcoRI* and *KpnI* and used for Southern blot analysis with the probe indicated in (A).

|                               |        | helix A | TRP1              | helix B | helix A    |      |         |     |
|-------------------------------|--------|---------|-------------------|---------|------------|------|---------|-----|
| <i>H. sapiens</i> NP_000424.2 | 526 aa | 1       |                   |         |            | 50   |         |     |
| <i>E. festucae</i> BAF36501   | 519 aa | 1       |                   |         |            | 49   |         |     |
| <i>N. crassa</i> NOX-R        | 517 aa | 1       |                   |         |            | 49   |         |     |
| <i>A. nidulans</i> XP_6636501 | 517 aa | 1       |                   |         |            | 49   |         |     |
| <i>M. grisea</i> XP_359497.1  | 525 aa | 1       |                   |         |            | 49   |         |     |
|                               |        |         | TRP2              | helix B | helix A    | TRP3 | helix B |     |
| <i>H. sapiens</i> NP_000424.2 | 526 aa | 51      |                   |         |            |      |         | 100 |
| <i>E. festucae</i> BAF36501   | 519 aa | 50      |                   |         |            |      |         | 99  |
| <i>N. crassa</i> NOX-R        | 517 aa | 50      |                   |         |            |      |         | 99  |
| <i>A. nidulans</i> XP_6636501 | 517 aa | 50      |                   |         |            |      |         | 99  |
| <i>M. grisea</i> XP_359497.1  | 525 aa | 50      |                   |         |            |      |         | 99  |
|                               |        |         | Helix A           | TRP4    | helix B    |      |         |     |
| <i>H. sapiens</i> NP_000424.2 | 526 aa | 101     |                   |         |            |      |         | 150 |
| <i>E. festucae</i> BAF36501   | 519 aa | 100     |                   |         |            |      |         | 149 |
| <i>N. crassa</i> NOX-R        | 517 aa | 100     |                   |         |            |      |         | 149 |
| <i>A. nidulans</i> XP_6636501 | 517 aa | 100     |                   |         |            |      |         | 149 |
| <i>M. grisea</i> XP_359497.1  | 525 aa | 100     |                   |         |            |      |         | 149 |
|                               |        |         |                   |         |            |      |         |     |
| <i>H. sapiens</i> NP_000424.2 | 526 aa | 151     |                   |         |            |      |         | 200 |
| <i>E. festucae</i> BAF36501   | 519 aa | 150     |                   |         |            |      |         | 197 |
| <i>N. crassa</i> NOX-R        | 517 aa | 150     |                   |         |            |      |         | 197 |
| <i>A. nidulans</i> XP_6636501 | 517 aa | 150     |                   |         |            |      |         | 189 |
| <i>M. grisea</i> XP_359497.1  | 525 aa | 150     |                   |         |            |      |         | 197 |
|                               |        |         | Activation domain | P-rich  | SH3 domain |      |         |     |
| <i>H. sapiens</i> NP_000424.2 | 526 aa | 201     |                   |         |            |      |         | 250 |
| <i>E. festucae</i> BAF36501   | 519 aa | 198     |                   |         |            |      |         | 247 |
| <i>N. crassa</i> NOX-R        | 517 aa | 198     |                   |         |            |      |         | 247 |
| <i>A. nidulans</i> XP_6636501 | 517 aa | 190     |                   |         |            |      |         | 224 |
| <i>M. grisea</i> XP_359497.1  | 525 aa | 198     |                   |         |            |      |         | 247 |
|                               |        |         |                   |         |            |      |         |     |
| <i>H. sapiens</i> NP_000424.2 | 526 aa | 251     |                   |         |            |      |         | 298 |
| <i>E. festucae</i> BAF36501   | 519 aa | 248     |                   |         |            |      |         | 289 |
| <i>N. crassa</i> NOX-R        | 517 aa | 248     |                   |         |            |      |         | 291 |
| <i>A. nidulans</i> XP_6636501 | 517 aa | 225     |                   |         |            |      |         | 274 |
| <i>M. grisea</i> XP_359497.1  | 525 aa | 248     |                   |         |            |      |         | 292 |
|                               |        |         |                   |         |            |      |         |     |
| <i>H. sapiens</i> NP_000424.2 | 526 aa | 299     |                   |         |            |      |         | 348 |
| <i>E. festucae</i> BAF36501   | 519 aa | 290     |                   |         |            |      |         | 335 |
| <i>N. crassa</i> NOX-R        | 517 aa | 292     |                   |         |            |      |         | 339 |
| <i>A. nidulans</i> XP_6636501 | 517 aa | 275     |                   |         |            |      |         | 324 |
| <i>M. grisea</i> XP_359497.1  | 525 aa | 293     |                   |         |            |      |         | 339 |
|                               |        |         | PB1 domain        |         |            |      |         |     |
| <i>H. sapiens</i> NP_000424.2 | 526 aa | 349     |                   |         |            |      |         | 398 |
| <i>E. festucae</i> BAF36501   | 519 aa | 336     |                   |         |            |      |         | 380 |
| <i>N. crassa</i> NOX-R        | 517 aa | 340     |                   |         |            |      |         | 378 |
| <i>A. nidulans</i> XP_6636501 | 517 aa | 325     |                   |         |            |      |         | 374 |
| <i>M. grisea</i> XP_359497.1  | 525 aa | 340     |                   |         |            |      |         | 380 |
|                               |        |         |                   |         |            |      |         |     |
| <i>H. sapiens</i> NP_000424.2 | 526 aa | 399     |                   |         |            |      |         | 444 |
| <i>E. festucae</i> BAF36501   | 519 aa | 381     |                   |         |            |      |         | 425 |
| <i>N. crassa</i> NOX-R        | 517 aa | 378     |                   |         |            |      |         | 423 |
| <i>A. nidulans</i> XP_6636501 | 517 aa | 375     |                   |         |            |      |         | 423 |
| <i>M. grisea</i> XP_359497.1  | 525 aa | 381     |                   |         |            |      |         | 427 |
|                               |        |         | SH3 domain        |         |            |      |         |     |
| <i>H. sapiens</i> NP_000424.2 | 526 aa | 445     |                   |         |            |      |         | 489 |
| <i>E. festucae</i> BAF36501   | 519 aa | 426     |                   |         |            |      |         | 470 |
| <i>N. crassa</i> NOX-R        | 517 aa | 424     |                   |         |            |      |         | 468 |
| <i>A. nidulans</i> XP_6636501 | 517 aa | 424     |                   |         |            |      |         | 469 |
| <i>M. grisea</i> XP_359497.1  | 525 aa | 428     |                   |         |            |      |         | 477 |
|                               |        |         |                   |         |            |      |         |     |
| <i>H. sapiens</i> NP_000424.2 | 526 aa | 489     |                   |         |            |      |         | 526 |
| <i>E. festucae</i> BAF36501   | 519 aa | 471     |                   |         |            |      |         | 519 |
| <i>N. crassa</i> NOX-R        | 517 aa | 469     |                   |         |            |      |         | 517 |
| <i>A. nidulans</i> XP_6636501 | 517 aa | 470     |                   |         |            |      |         | 515 |
| <i>M. grisea</i> XP_359497.1  | 525 aa | 478     |                   |         |            |      |         | 525 |
|                               |        |         |                   |         |            |      |         |     |
| <i>H. sapiens</i> NP_000424.2 | 526 aa | 526     | --                | 526     |            |      |         |     |
| <i>E. festucae</i> BAF36501   | 519 aa | 519     | --                | 519     |            |      |         |     |
| <i>N. crassa</i> NOX-R        | 517 aa | 517     | --                | 517     |            |      |         |     |
| <i>A. nidulans</i> XP_6636501 | 517 aa | 516     | MI                | 517     |            |      |         |     |
| <i>M. grisea</i> XP_359497.1  | 525 aa | 525     | --                | 525     |            |      |         |     |

**Fig. S4.** The amino acid sequence of *N. crassa* NOR-1 is aligned with human p67<sup>phox</sup>, *E. festucae* NoxR and orthologs from *A. nidulans* and *M. grisea*. Sequences are identified by species name, GenBank accession and protein size. Top red bar indicates the active domain. Top black bars show the helices between tetratricopetide domains (TRP). Proline rich region, SH3 and PB1 domains are indicated by pink, black and blue rectangles, respectively.

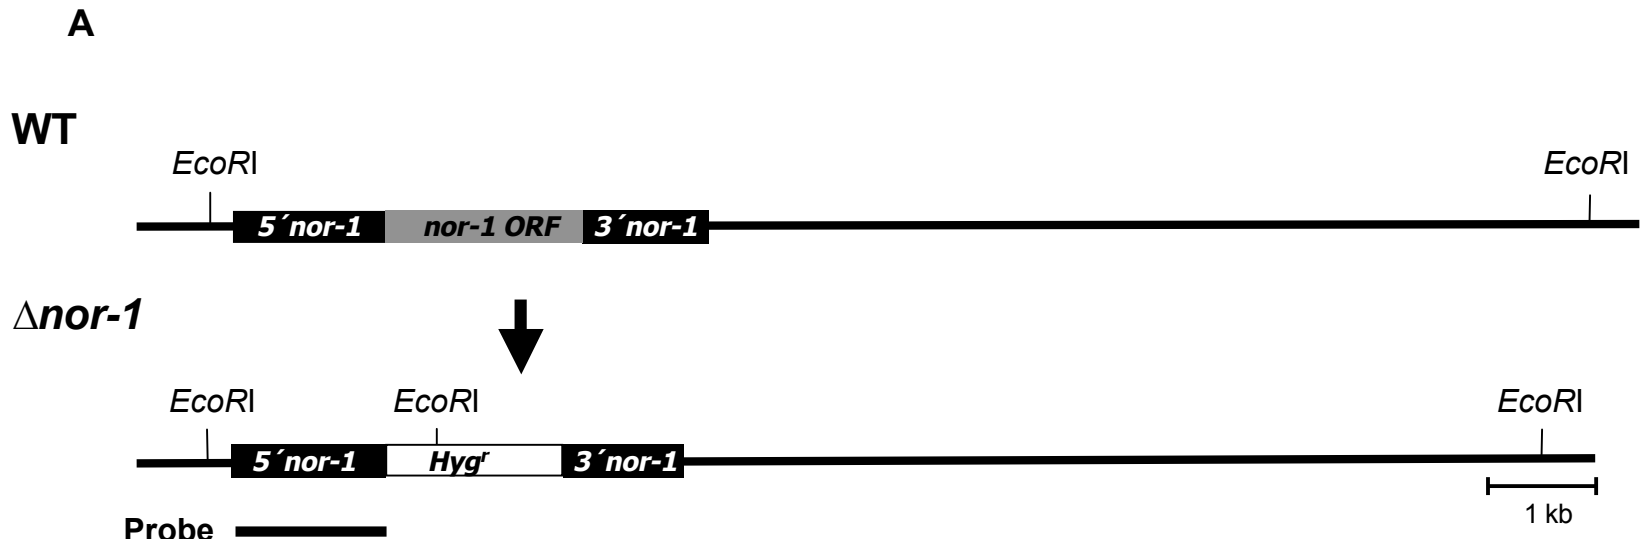

**B**

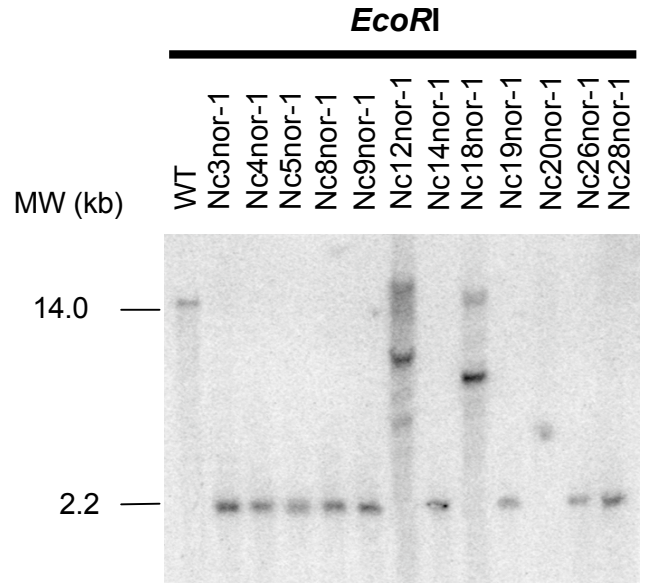

**Fig. S5. Deletion of the *nor-1* gene.** (A) The *nor-1* deletion construct, containing the hygromycin resistance gene, was generated by double-joint PCR and used to transform strain  $\Delta mus-51$ . A double recombination event results in replacement of the wild type locus by the deletion construct. (B) To verify *nor-1* deletion, DNA from WT and hygromycin resistance transformants was digested with *EcoRI* and used for Southern blot analysis with the indicated probe. The wild type *EcoRI* pattern corresponds to a single band of 14.0 kb, while the  $\Delta nor-1$  pattern corresponds to one band of 2.2 kp.

|                                      |     |                                                      |      |
|--------------------------------------|-----|------------------------------------------------------|------|
| <i>M. musculus</i> P12815 191 aa     | 1   | MAAY-SYRPG-----                                      | 9    |
| <i>D. discoideum</i> AAM00240 205 aa | 1   | -MYGYTPAVVAP-----                                    | 13   |
| <i>N. crassa</i> XP_965123 311 aa    | 1   | MAYNRSYNPDELPRFAEPEPRQGTSPAPPQQAPTARYETKPPPPRPVEH    | 50   |
| <i>M. grisea</i> XP_362372 256 aa    | 1   | MAYNRPYNPDELPRFAEPESK-GSN-----QKLFSP----             | 30   |
| <i>G. zeae</i> XP_380620 286 aa      | 1   | MAYNRPYDEDA LPRFAEPEQKPGQSRTPAP-----QQHPPPPQ---      | 39   |
|                                      |     |                                                      |      |
| <i>M. musculus</i> P12815 191 aa     | 9   | -----                                                | 9    |
| <i>D. discoideum</i> AAM00240 205 aa | 13  | -----                                                | 13   |
| <i>N. crassa</i> XP_965123 311 aa    | 51  | RNTGFQRQNSYDPQRQNTYNQAYHQAYTQNHYASGSADPHRLSPRMQ      | 100  |
| <i>M. grisea</i> XP_362372 256 aa    | 30  | -----SQASPO-----FHQPQHPQSRYEN-----                   | 49   |
| <i>G. zeae</i> XP_380620 286 aa      | 39  | -----QQYQHAPP-----QQYHQQSRYDKPLPTQRDARSHSL           | 74   |
|                                      |     |                                                      |      |
| <i>M. musculus</i> P12815 191 aa     | 9   | -----PGGGPGPAAGAALP-----DQSF L                       | 28   |
| <i>D. discoideum</i> AAM00240 205 aa | 13  | ---TVMSFSFVFPQAFQQCWFYS-----LYTQIQQAQLYEM            | 46   |
| <i>N. crassa</i> XP_965123 311 aa    | 101 | QGPPPDYRGMSPPPSATGSRPAHNNLPPVSSRPPPS---PTTRDGADPTL   | 147  |
| <i>M. grisea</i> XP_362372 256 aa    | 49  | -KPVPPRPDQRLG SATQQR-----PPVTSRPPSPAPPETKGDNDPTL     | 92   |
| <i>G. zeae</i> XP_380620 286 aa      | 75  | QQGPASHGYMSPPPNTGGARPQAHNRPA PNSRPPSP--ALDGN GSDPTL  | 122  |
|                                      |     |                                                      |      |
|                                      |     | EF-1                                                 | EF-2 |
| <i>M. musculus</i> P12815 191 aa     | 29  | WNVFRVVDKDRSGVITSDNELQQALNNGTWTFFNPVTVRSTIISMFDRENKA | 78   |
| <i>D. discoideum</i> AAM00240 205 aa | 47  | QSWFMRYDANRSGTISSGELQYLNIGG--IPLGIETATKLIKVF DHNKNG  | 94   |
| <i>N. crassa</i> XP_965123 311 aa    | 148 | LPLFRAVDKDG TGQLSERELSAALVNGDWTAFDPHTVRRMIRMFDSDRSG  | 197  |
| <i>M. grisea</i> XP_362372 256 aa    | 93  | RPLFRAVDKDG TGQLSEKELSAALVNGDWTAFDPHTVRRMIRMF DADRSG | 142  |
| <i>G. zeae</i> XP_380620 286 aa      | 123 | LPLFRAVDKDG TGHL SERELSAALVNGDWTAFDPHTVRRMIRMFDSDRSG | 172  |
|                                      |     |                                                      |      |
|                                      |     | EF-3                                                 |      |
| <i>M. musculus</i> P12815 191 aa     | 79  | GVNRFSEFTGVVKYITDQNVFRTYDRNNSGMIDKNELKQALSGFGYRLSD   | 128  |
| <i>D. discoideum</i> AAM00240 205 aa | 95  | QIDFYEAALHOFINNLYRCFVANDRNFSGCTIDANEIYNALITSGFQLPF   | 144  |
| <i>N. crassa</i> XP_965123 311 aa    | 198 | TIGFEFCGLWSFLASWRTLFD RFDMDKSGNISLDEFNNALVAFRYRLSP   | 247  |
| <i>M. grisea</i> XP_362372 256 aa    | 143 | TIGFEFCGLWSFLASWRTLFD RFDMDKSGNISLDEFNNALVAFRYRLSD   | 192  |
| <i>G. zeae</i> XP_380620 286 aa      | 173 | TIGFEFCGLWSFLASWRTLFD RFDADRSGNISLSDEFNNALVAFRYRLSP  | 222  |
|                                      |     |                                                      |      |
|                                      |     | EF-4                                                 | EF-5 |
| <i>M. musculus</i> P12815 191 aa     | 129 | QFHDILLRKFDRCGRQIAFDDFIQGCIVLQRLTDFRRYDTDQDGWIQV     | 178  |
| <i>D. discoideum</i> AAM00240 205 aa | 145 | PTVNYLFLKLSPSGYG-LLFTQFLNLCA TVALTRSLFEWNDPMRTGVVHL  | 193  |
| <i>N. crassa</i> XP_965123 311 aa    | 248 | RFVELLERTYDKRGGVMSFDL FVQACISLKRMTDVFKRYDDDRDGYITL   | 297  |
| <i>M. grisea</i> XP_362372 256 aa    | 193 | RFTPELLERTYDKRGGVMSFDL FVQSCISLKRMTDVFKRYDDDRDGYITL  | 242  |
| <i>G. zeae</i> XP_380620 286 aa      | 223 | QFVELIFNTYDKRNEGVM SFDL FVQSCISLKRMTDVFKRYDDDRDGYITL | 272  |
|                                      |     |                                                      |      |
| <i>M. musculus</i> P12815 191 aa     | 179 | SYEQYLSMVFSTV- 191                                   |      |
| <i>D. discoideum</i> AAM00240 205 aa | 194 | NLAQLYDIHALV-- 205                                   |      |
| <i>N. crassa</i> XP_965123 311 aa    | 298 | SFEDFLTELLRQLK 311                                   |      |
| <i>M. grisea</i> XP_362372 256 aa    | 243 | SFEDFLTELLKQLK 256                                   |      |
| <i>G. zeae</i> XP_380620 286 aa      | 273 | SFEDFLTELLKQLK 286                                   |      |

**Fig. S6.** *N. crassa* predicted PEF-1 protein is aligned with *Mus musculus* (mouse) Alg-2, *Dictyostelium discoideum* Alg-2b and hypothetical orthologs from *Magnaporthe grisea* and *Giberella zeae*. Sequences are identified by species name, followed by GeneBank accession or contig number and protein size. Top bars indicate EF-hand domains as deduced from ExPASy-Prosite database (<http://www.expasy.org/prosite/>).

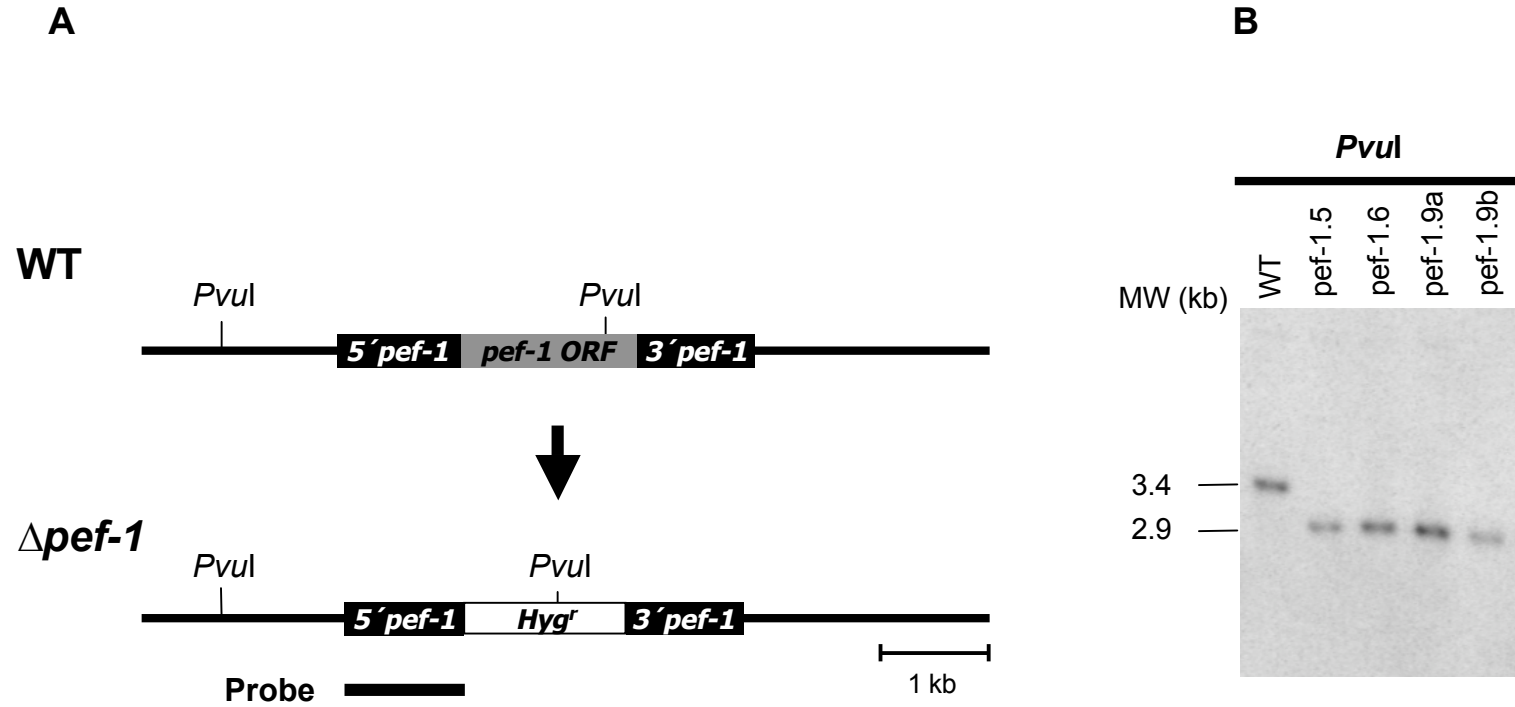

**Fig. S7. Deletion of the *pef-1* gene.** (A) A *pef-1* deletion construct based on the hygromycin resistance gene was generated by double-joint PCR and used to transform strain  $\Delta$ *mus-51*. Double recombination results in replacement of the wild type *pef-1* locus. (B) To verify *pef-1* deletion, DNA from WT and hygromycin resistance transformants was digested with *PvuI* and used for Southern blot analysis with the probe indicated in (A). The wild type *PvuI* pattern corresponds to one band of 3.4 kb; the  $\Delta$ *pef-1* pattern corresponds to a band of 2.9 kb.
